# Supplementary material for: OsCNGC13 promotes seed-setting rate by facilitating pollen tube growth in stylar tissues
Source: PubMed Central journal article supplement (PMC5533464; doi:10.1371/journal.pgen.1006906), 2017-07-14
Supplement: pgen.1006906.s013.pdf [file pgen.1006906.s013.pdf]

**S1 Table. Seed-setting rate of the reciprocal crosses.**

| Materials |               | Seed-setting rate (%) |               |
|-----------|---------------|-----------------------|---------------|
|           |               | ♂                     |               |
|           |               | 9311                  | <i>sss1-D</i> |
| ♀         | 9311          | 87.7 ± 6.8            | 91.1 ± 5.2    |
|           | <i>sss1-D</i> | 41.9 ± 9.4            | 30 ± 17.3     |

♀, crossed as the female parents; ♂, crossed as the male parents. For each cross, the seed-setting rate was calculated using 3 independent panicles, each with at least 40 emasculated spikelets.
