# Supplementary material for: OsCNGC13 promotes seed-setting rate by facilitating pollen tube growth in stylar tissues
Source: PubMed Central journal article supplement (PMC5533464; doi:10.1371/journal.pgen.1006906), 2017-07-14
Supplement: pgen.1006906.s014.pdf [file pgen.1006906.s014.pdf]

**S2 Table. Seed-setting rate (%), *OsCNGC13* expression levels and ovules with pollen tube (%) in several RNAi transgenic lines.**

| Background                    | Lines                       | Seed-setting rate (%) | Relative mRNA level | Correlation coefficient | Ovules with pollen tube (%) | Correlation coefficient |
|-------------------------------|-----------------------------|-----------------------|---------------------|-------------------------|-----------------------------|-------------------------|
| Kitaake<br>ORF1-RNAi<br>lines | WT                          | 98.04 ± 3.396         | 1 ± 0.006           | 0.939**                 | 94.44 ± 1.571               | 0.909**                 |
|                               | WT <sup>ORF1-RNAi</sup> -1  | 62.89 ± 8.460         | 0.05 ± 0.001        |                         | 54.44 ± 5.666               |                         |
|                               | WT <sup>ORF1-RNAi</sup> -3  | 64.73 ± 1.681         | 0.16 ± 0.002        |                         | 57.78 ± 1.571               |                         |
|                               | WT <sup>ORF1-RNAi</sup> -4  | 80.96 ± 3.511         | 0.65 ± 0.009        |                         | 80.00 ± 7.201               |                         |
|                               | WT <sup>ORF1-RNAi</sup> -5  | 59.85 ± 7.387         | 0.03 ± 0.001        |                         | 57.78 ± 5.666               |                         |
|                               | WT <sup>ORF1-RNAi</sup> -7  | 67.63 ± 1.673         | 0.17 ± 0.005        |                         | 61.11 ± 6.285               |                         |
|                               | WT <sup>ORF1-RNAi</sup> -8  | 66.80 ± 3.717         | 0.05 ± 0.003        |                         | 58.89 ± 6.285               |                         |
|                               | WT <sup>ORF1-RNAi</sup> -9  | 77.33 ± 13.31         | 0.56 ± 0.005        |                         | 82.22 ± 1.571               |                         |
|                               | WT <sup>ORF1-RNAi</sup> -10 | 67.85 ± 9.425         | 0.07 ± 0.001        |                         | 53.33 ± 9.425               |                         |
|                               | WT <sup>ORF1-RNAi</sup> -11 | 82.54 ± 4.864         | 0.82 ± 0.013        |                         | 87.78 ± 5.443               |                         |
|                               | WT <sup>ORF1-RNAi</sup> -12 | 57.04 ± 11.4          | 0.08 ± 0.006        |                         | 61.11 ± 1.571               |                         |
|                               | WT <sup>ORF1-RNAi</sup> -13 | 62.27 ± 3.642         | 0.03 ± 0.003        |                         | 57.78 ± 1.571               |                         |
|                               | WT <sup>ORF1-RNAi</sup> -14 | 66.67 ± 5.774         | 0.07 ± 0.003        |                         | 66.67 ± 2.722               |                         |
|                               | WT <sup>ORF1-RNAi</sup> -15 | 56.27 ± 4.194         | 0.07 ± 0.001        |                         | 47.78 ± 7.573               |                         |
|                               | WT <sup>ORF1-RNAi</sup> -16 | 57.62 ± 5.487         | 0.06 ± 0.004        |                         | 61.11 ± 5.666               |                         |
|                               | WT <sup>ORF1-RNAi</sup> -29 | 63.74 ± 7.705         | 0.15 ± 0.001        |                         | 57.78 ± 3.721               |                         |

Seed-setting rate (%), relative expression levels and ovules with pollen tube (%) are measured as the mean ± SD (n=3). The relative expression level of the *OsCNGC13* gene in each transgenic plant line was determined by qRT-PCR using the primer pair 5F/5R in Fig 2D with the RNA isolated from flag leaves at heading stage. A P <0.01 was used for correlation (Pearson correlation analysis).
