# Supplementary material for: OsCNGC13 promotes seed-setting rate by facilitating pollen tube growth in stylar tissues
Source: PubMed Central journal article supplement (PMC5533464; doi:10.1371/journal.pgen.1006906), 2017-07-14
Supplement: pgen.1006906.s015.pdf [file pgen.1006906.s015.pdf]

**S3 Table. List of primers used in this study.**

| Mapping primers                               |                               |                          |                    |
|-----------------------------------------------|-------------------------------|--------------------------|--------------------|
| Primer name                                   | Forward sequence (5'-3')      | Reverse sequence (5'-3') |                    |
| Indel                                         |                               |                          |                    |
| 6-26                                          | CTCAACGTTGACACCTCGTG          | TCCTCCATCGAGCAGTATCA     |                    |
| Q-7                                           | CATCCCAAACCTACCAACCAA         | GAGATGTGACGAGGGAAGAG     |                    |
| Q-17                                          | GACACGTTTAGCTGCGTAGTT         | CCTTCAATGGTCGTATCTTCT    |                    |
| Q-26                                          | TACTAGATGGGATGAAAATCA         | GAATAATGCCTCACCTGTGC     |                    |
| Y-6                                           | TAGGTGGATCTATTGTATTTA         | CAATTCTCTTATACTTCAACA    |                    |
| Y-13                                          | TCCGATGCTTCAATCAACAGTC        | GGTTTGGGAGGATTGGGAAT     |                    |
| Y-14                                          | AAATAAAAAAAGAAGGGGCT          | TTCAATGAGAAGTTGGTGGT     |                    |
| Y-80                                          | GCTGCTACTACCTCTGCCTCTTCC      | TCAATCGATCCATCCATCTCTCC  |                    |
| dCAPS                                         |                               |                          | Restriction enzyme |
| Q-20                                          | GTCAGTAGCAGATC                | AACGTTGGTGCATAGCGGAC     | BglII              |
| Primers for confirming the fragment inversion |                               |                          |                    |
| Primer name                                   | Primer sequence (5' to 3')    |                          |                    |
| 1F                                            | ACAAGAATCCCGTAGACAT           |                          |                    |
| 1R                                            | CATTAGCACGTTGGACATA           |                          |                    |
| 2F                                            | CATACAATGACCCACTCCTAAC        |                          |                    |
| 2R                                            | CTTCATCATGCTCCTCTTCC          |                          |                    |
| 3F                                            | TCTTAGCAGCGAGATGCAGTTCC       |                          |                    |
| 3R                                            | TGTGCCGCACGCAATGGT            |                          |                    |
| 4F                                            | AGATTGTATTCAGAAAGGCAGGTC      |                          |                    |
| 4R                                            | TGGGTGTAGATGTACGAGGAGC        |                          |                    |
| Quantitative PCR Primers                      |                               |                          |                    |
| Primer name                                   | Primer sequence (5' to 3')    |                          |                    |
| 5F                                            | AGTAGTGGGAACTGGAGATTTGG       |                          |                    |
| 5R                                            | CATCACCTGAGGGAGTGGAAAG        |                          |                    |
| 6F                                            | TGCTAACACAGAACCTGGACTT        |                          |                    |
| 6R                                            | GGACCCTATGAGTAATGCGAAAA       |                          |                    |
| 7F                                            | TGGGCATGTCGTTGGTTCA           |                          |                    |
| 7R                                            | ACAGGCTTGGGTGGTTGG            |                          |                    |
| Primer name                                   | Forward sequence (5'-3')      | Reverse sequence (5'-3') |                    |
| qRT-ORF2                                      | AGACAGAGACAGGGAGATGTTGC       | AGCAGCAGAGGATGAATGGTTCCG |                    |
| qRT-ORF3                                      | CGCCGAGAACGACAAGAT            | CGACACGCGGTCCAGC         |                    |
| OsMPK20-4                                     | GATTCCAGGTAGAACAGGAC          | GCTCTCTTTCTGAGCTATCC     |                    |
| OsAOS2                                        | CAATACGTGTACTGGTCGAATGG       | AAGGTGTCGTACCGGAGGAA     |                    |
| OsVPE3                                        | CGGTAACACAGGCACCAGGC          | GTGACTTCGTCTCCAGTGAATCC  |                    |
| Ubq                                           | GCTCCGTGGCGGTATCAT            | CGGCAGTTGACAGCCCTAG      |                    |
| 3' RACE gene-specific primers                 |                               |                          |                    |
| Primer name                                   | Primer sequence (5' to 3')    |                          |                    |
| RACE-1                                        | TAGTGGGAACTGGAGATTTGGTTGATGAG |                          |                    |

| RACE-2                                              | GGGCATGTCGTTGGTTCATGTTGGTA                             |                    |
|-----------------------------------------------------|--------------------------------------------------------|--------------------|
| RACE-3                                              | TCAGATACTTCCCAACCACCCAAGCC                             |                    |
| Binary vector construction primers                  |                                                        |                    |
| Primer name                                         | Primer sequence (5' to 3')                             | Restriction enzyme |
| pORF1-1305-EcoRI-F                                  | ATT <b>GAATTC</b> CATCCATTTTAGGGTCCAC                  | EcoRI              |
| pORF1-1305-KpnI-R                                   | ATT <b>GGTACC</b> TTCTTACACGGAACCCAAC                  | KpnI               |
| ORF1-1305-BamHI-F                                   | AGGTACCCGG <b>GGATCC</b> ATGTCTGGCCAAGAGAGAGA          | BamHI              |
| ORF1-1305-XbaI-R                                    | GCAGGTGCGACT <b>TAGACT</b> ATTGCAACCTTTGCATCT          | XbaI               |
| ORF1-1305-GFP-SpeI-F                                | ATT <b>ACTAGT</b> ATGTCTGGCCAAGAGAGAG                  | SpeI               |
| ORF1-1305-GFP-BamHI-R                               | AAT <b>GGATCC</b> TTGCAACCTTTGCATC                     | BamHI              |
| gORF3-1305-EcoRI-F                                  | CCATGATTAC <b>GAATTC</b> TTCTTACCCATCATAAACCAT         | EcoRI              |
| gORF3-1305-EcoRI-R                                  | AAAATGGATG <b>GAATTC</b> TACCCGAACCATTCATCCT           | EcoRI              |
| ORF3-1305-GFP-SpeI-F                                | ATT <b>ACTAGT</b> ATGGATTTGCGCGACGAACC                 | SpeI               |
| ORF3-1305-GFP-BamHI-R                               | AAT <b>GGATCC</b> GGGGTGGTGGCCATGGGCGG                 | BamHI              |
| OsCNGC13-D-1305-BamHI-F                             | AGGTACCCGG <b>GGATCC</b> ATGTCTGGCCAAGAGAGAGA          | BamHI              |
| OsCNGC13-D-1305-XbaI-R                              | GCAGGTGCGACT <b>TAGATT</b> ATGTCCAACGTGCTAATG          | XbaI               |
| 20bp-pOs-Cas9-ORF1F <sup>1</sup>                    | AGATGATCCGTGGCAGACTCAATCATATCCACAGGT<br>TTTAGAGCTATGC  | BsaI               |
| 20bp-pOs-Cas9-ORF1R                                 | GCATAGCTCTAAAACCTGTGGGATATGATTGAGCTG<br>CCACGGATCATCT  | BsaI               |
| 20bp-pOs-Cas9-ORF3F                                 | AGATGATCCGTGGCACCCGCTGGTTCTCGTCCGGGG<br>TTTTAGAGCTATGC | BsaI               |
| 20bp-pOs-Cas9-ORF3R                                 | GCATAGCTCTAAAACCCCGGACGAGAACCAGCGGGT<br>GCCACGGATCATCT | BsaI               |
| ORF1RNAi-B-K                                        | AAT <b>GGATCC GGTACC</b> TTGAACAACCTCAGACTTAAC         | BamHI,<br>KpnI     |
| ORF1RNAi-M-S                                        | AAT <b>ACGCGT GAGCTC</b> AGCCGGACCTTCTTAAGGAA          | MluI,<br>SacI      |
| pOsCNGC13-1305-GUS-EcoRI-F                          | CCATGATTAC <b>GAATTC</b> CATCCATTTTAGGGTCCAC           | EcoRI              |
| pOsCNGC13-1305-GUS-NcoI-R                           | CTCAGATCT <b>ACCATGG</b> TTCTTACACGGAACCCAAC           | NcoI               |
| In situ hybridization primers                       |                                                        |                    |
| OsCNGC13-pGEM-T-F                                   | ATGCTAGAGCTACAAAGATT                                   |                    |
| OsCNGC13-pGEM-T-R                                   | CTGGTCATAAGGCCAGTTAC                                   |                    |
| Subcellular localization in rice protoplasts primer |                                                        |                    |
| OsCNGC13-pA7-GFP-XhoI-F                             | ACGAACGATA <b>CTCGAG</b> ATGTCTGGCCAAGAGAGAGA          | XhoI               |
| OsCNGC13-pA7-GFP-SpeI-R                             | GCTCACCAT <b>CTAG</b> TTGCAACCTTTGCATCTCAG             | SpeI               |
| Yeast two-hybrid vector construction primers        |                                                        |                    |
| OsCNGC13-pDHB1-NcoI-F                               | GGCCAGGCCT <b>CCATGG</b> ATGTCTGGCCAAGAGAGAGA          | NcoI               |
| OsCNGC13-pDHB1-NcoI-R                               | CCAAGATATA <b>CCATGG</b> TTGCAACCTTTGCATCTCAG          | NcoI               |
| OsCNGC13-D-pDHB1-NcoI-F                             | GGCCAGGCCT <b>CCATGG</b> ATGTCTGGCCAAGAGAGAGA          | NcoI               |

|                                                             |                                                           |       |
|-------------------------------------------------------------|-----------------------------------------------------------|-------|
| OsCNGC13-D-pDHB1-NcoI-R                                     | CCAAGATAT <b>CCATGGT</b> GTCCAACGTGCTAATGACA              | NcoI  |
| OsCNGC13-pPR3-N-BamHI-F                                     | AGATTACGCT <b>GGATCC</b> ATGTCTGGCCAAGAGAGAGA             | BamHI |
| OsCNGC13-pPR3-N-BamHI-R                                     | ACCACTGCTT <b>GGATCC</b> TTGCAACCTTTGCATCTCAG             | BamHI |
| OsCNGC13-D-pPR3-N-BamHI-F                                   | AGATTACGCT <b>GGATCC</b> ATGTCTGGCCAAGAGAGAGA             | BamHI |
| OsCNGC13-D-pPR3-N-BamHI-R                                   | ACCACTGCTT <b>GGATCC</b> GTCCAACGTGCTAATGACA              | BamHI |
| BiFC assay primers                                          |                                                           |       |
| OsCNGC13-p2Y-N- PacI-F                                      | CATTTACGAACGATAG <b>TTAATTA</b> AATGTCTGGCCAAGA<br>GAGAGA | PacI  |
| OsCNGC13-p2Y-N- SpeI-R                                      | CACTGCCACCTCCTCC <b>ACTAGT</b> TTGCAACCTTTGCAT<br>CTCAG   | SpeI  |
| OsCNGC13-D-p2Y-C- PacI-F                                    | CATTTACGAACGATAG <b>TTAATTA</b> AATGTCTGGCCAAGA<br>GAGAGA | PacI  |
| OsCNGC13-D-p2Y-C- SpeI-R                                    | CACTGCCACCTCCTCC <b>ACTAGT</b> TTGTCCAACGTGCTAA<br>TGACA  | SpeI  |
| Primers used in patch-clamping recordings from HEK293 cells |                                                           |       |
| OsCNGC13-pCl-neo-EcoRI-F                                    | CTAGCCTCGAG <b>GAATTC</b> ATGTCTGGCCAAGAGAGAGA            | EcoRI |
| OsCNGC13-pCl-neo-XbaI-R                                     | CCGGGTCGACT <b>CTAGACT</b> ATTGCAACCTTTGCATCT             | XbaI  |
| OsCNGC13-D-pCl-neo-EcoRI-F                                  | CTAGCCTCGAG <b>GAATTC</b> ATGTCTGGCCAAGAGAGAGA            | EcoRI |
| OsCNGC13-D-pCl-neo-XbaI-R                                   | CCGGGTCGACT <b>CTAGATT</b> ATGTCCAACGTGCTAATG             | XbaI  |

<sup>1</sup> The 20-bp gene-specific sequences are underlined in 20bp-pOs-Cas9-ORF1F, 20bp-pOs-Cas9-ORF1R, 20bp-pOs-Cas9-ORF3F and 20bp-pOs-Cas9-ORF3R, respectively.
